# Supplementary material for: Staphylococcus epidermidis: A differential trait of the fecal microbiota of breast-fed infants
Source: PubMed Central journal article supplement (PMC2551609; doi:10.1186/1471-2180-8-143), 2008-09-10
Supplement: 1471-2180-8-143-S1.pdf [file 1471-2180-8-143-S1.pdf]

**Analysis of virulence determinants among the 51 *S. epidermidis* strains.**

| Mother-infant Pair | Strain | Source <sup>a</sup> | SCC         |      |            |             |             |             | CRA <sup>b</sup> | Oxacillin resistance | Hemolysin |
|--------------------|--------|---------------------|-------------|------|------------|-------------|-------------|-------------|------------------|----------------------|-----------|
|                    |        |                     | <i>mecA</i> | type | <i>fbe</i> | <i>atfE</i> | <i>icaD</i> | <i>embp</i> |                  |                      |           |
| 1                  | LC002  | M/BF                | +           | IV   | -          | +           | +           | +           | +                | +                    | -         |
| 1                  | LC011  | M/BF                | +           | IV   | -          | +           | -           | +           | -                | +                    | -         |
| 1                  | LC015  | M                   | -           | -    | +          | +           | -           | +           | -                | -                    | -         |
| 1                  | LC016  | M                   | -           | -    | -          | +           | -           | +           | -                | -                    | -         |
| 1                  | LC017  | M                   | -           | -    | -          | +           | -           | +           | -                | -                    | -         |
| 1                  | LC019  | M                   | -           | -    | +          | +           | -           | +           | -                | -                    | -         |
| 1                  | LC044  | M                   | +           | IV   | +          | +           | -           | +           | -                | +                    | -         |
| 1                  | LC047  | M                   | -           | -    | +          | +           | -           | +           | -                | +                    | -         |
| 2                  | LE010  | M                   | -           | -    | -          | +           | -           | +           | -                | -                    | -         |
| 2                  | LE011  | M                   | -           | -    | -          | +           | -           | +           | -                | -                    | -         |
| 2                  | LE035  | M                   | -           | -    | -          | +           | -           | +           | -                | -                    | -         |
| 3                  | LF001  | M/BF                | -           | -    | -          | +           | +           | +           | +                | -                    | -         |
| 3                  | LF003  | M                   | -           | -    | -          | +           | -           | +           | -                | +                    | -         |
| 4                  | LG005  | M/BF                | -           | -    | +          | +           | -           | +           | -                | -                    | +         |
| 4                  | LG006  | M                   | +           | IV   | -          | +           | -           | +           | -                | -                    | -         |
| 4                  | LG011  | M/BF                | -           | -    | -          | +           | -           | +           | -                | +                    | -         |
| 4                  | LG5021 | M                   | -           | -    | +          | +           | -           | +           | -                | -                    | -         |
| 4                  | LG5022 | M                   | -           | -    | +          | +           | -           | +           | -                | -                    | -         |
| 4                  | LG5023 | M/BF                | -           | -    | +          | +           | +           | +           | -                | -                    | -         |
| 5                  | LH522  | M                   | -           | -    | -          | +           | -           | +           | -                | +                    | -         |
| 5                  | LH524  | M                   | -           | -    | -          | +           | -           | +           | -                | -                    | -         |
| 6                  | LI55   | M                   | -           | -    | -          | +           | -           | +           | -                | -                    | -         |
| 7                  | LO102  | M/BF                | -           | -    | -          | +           | -           | +           | -                | +                    | -         |
| 7                  | LO103  | M/BF                | -           | -    | -          | +           | -           | +           | -                | -                    | -         |
| 7                  | LO502  | M                   | -           | -    | -          | +           | +           | +           | -                | -                    | -         |
| 7                  | HO122  | BF                  | +           | IV   | +          | +           | -           | +           | -                | -                    | -         |
| 8                  | LP222  | M                   | +           | IV   | +          | +           | -           | +           | -                | -                    | -         |
| 8                  | LP223  | M/BF                | +           | IV   | +          | +           | -           | +           | -                | +                    | -         |
| 8                  | LP242  | M/BF                | -           | -    | -          | +           | -           | +           | -                | -                    | -         |
| 8                  | LP245  | M                   | +           | IV   | -          | +           | +           | +           | +                | -                    | -         |
| 9                  | LM102  | M/BF                | -           | -    | -          | +           | -           | +           | -                | -                    | -         |
| 9                  | LM141  | M                   | -           | -    | -          | +           | -           | +           | -                | +                    | -         |
| 9                  | LM152  | M                   | -           | -    | -          | +           | -           | +           | -                | -                    | -         |
| 10                 | LV104  | M                   | -           | -    | -          | +           | +           | +           | +                | -                    | -         |
| 10                 | LV221  | M                   | +           | IV   | +          | +           | -           | +           | -                | -                    | -         |
| 10                 | LV222  | M                   | +           | IV   | -          | +           | -           | +           | -                | +                    | -         |
| 10                 | LV521  | M                   | +           | IV   | +          | +           | -           | +           | -                | +                    | -         |
| 11                 | LX103  | M/BF                | -           | -    | -          | +           | -           | +           | +                | -                    | -         |
| 11                 | LX123  | M/BF                | +           | IV   | -          | +           | +           | +           | +                | +                    | -         |
| 11                 | LX121  | M                   | -           | -    | -          | +           | -           | +           | -                | -                    | -         |
| 11                 | LX154  | M                   | +           | IV   | -          | +           | -           | +           | -                | -                    | -         |
| 12                 | LZ153  | M/BF                | +           | IV   | -          | +           | -           | +           | -                | +                    | -         |

**Analysis of virulence determinants among the 51 *S. epidermidis* strains (cont.)**

| Mother-<br>infant<br>Pair | Strain | Source <sup>a</sup> | SCC         |      |            |             |             |             | CRA <sup>b</sup> | Oxacillin<br>resistance | Hemolysin |
|---------------------------|--------|---------------------|-------------|------|------------|-------------|-------------|-------------|------------------|-------------------------|-----------|
|                           |        |                     | <i>mecA</i> | type | <i>fbe</i> | <i>atlE</i> | <i>icaD</i> | <i>embp</i> |                  |                         |           |
| 12                        | LZ221  | M/BF                | -           | -    | -          | +           | -           | +           | -                | -                       | -         |
| 12                        | HZ242  | BF                  | -           | -    | -          | +           | +           | +           | -                | +                       | -         |
| 13                        | LCC141 | M/BF                | +           | IV   | -          | +           | -           | +           | -                | +                       | -         |
| 13                        | LCC254 | M                   | -           | -    | -          | -           | -           | +           | -                | +                       | -         |
| 13                        | LCC521 | M                   | -           | -    | -          | +           | +           | +           | +                | -                       | -         |
| 14                        | LGG152 | M/BF                | -           | -    | -          | +           | -           | +           | -                | -                       | -         |
| 14                        | LGG252 | M                   | -           | -    | -          | +           | -           | +           | -                | -                       | -         |
| 15                        | LDD121 | M/BF                | -           | -    | -          | +           | +           | +           | +                | -                       | -         |
| 16                        | LFF101 | M/BF                | -           | -    | -          | +           | -           | +           | -                | -                       | -         |

<sup>a</sup>Source: isolated from milk (M), feces of breast-fed infants (BF) or both sources within the same mother-infant pair (M/BF); <sup>b</sup>CRA: Congo Red Agar Assay
