# Supplementary material for: Staphylococcus epidermidis: A differential trait of the fecal microbiota of breast-fed infants
Source: PubMed Central journal article supplement (PMC2551609; doi:10.1186/1471-2180-8-143), 2008-09-10
Supplement: 1471-2180-8-143-S2.pdf [file 1471-2180-8-143-S2.pdf]

**MIC distribution and percentage of resistance to different antibiotics among the *S. epidermidis* strains.**

| Antibiotic       | Number of isolates with MIC ( $\mu\text{g/ml}$ ) of |             |      |     |      |    |                 |    |    |    |    |     |     |     |     |     | S/R | % Resistance             |             |
|------------------|-----------------------------------------------------|-------------|------|-----|------|----|-----------------|----|----|----|----|-----|-----|-----|-----|-----|-----|--------------------------|-------------|
|                  | $\leq 0.03$                                         | 0.12        | 0.25 | 0.5 | 1    | 2  | 4               | 8  | 16 | 32 | 64 | 100 | 125 | 128 | 256 | 500 |     |                          | $\leq 1000$ |
| Penicillin       | 8                                                   | 5           |      | 6   | 3    | 6  | 5               | 18 |    |    |    |     |     |     |     |     |     | $\leq 0.12 / > 4$        | 35.29       |
| Ampicillin       |                                                     | 13          | 6    | 4   | 6    | 7  | 2               | 6  |    |    |    | 7   |     |     |     |     |     | $\leq 0.12 / > 4$        | 25.49       |
| Oxacillin        |                                                     |             | 12   | 14  | 3    | 5  | 17 <sup>c</sup> |    |    |    |    |     |     |     |     |     |     | $\leq 2 / > 2$           | 33.33       |
| Ciprofloxacin    |                                                     |             | 29   | 15  | 5    | 2  |                 |    |    |    |    |     |     |     |     |     |     | $\leq 1 / > 1$           | 3.91        |
| Fosfomicin       |                                                     |             |      |     |      |    |                 |    | 45 | 4  | 1  |     | 1   |     |     |     |     | $\leq 16 / > 16$         | 11.76       |
| Nitrofurantoin   |                                                     |             |      |     |      |    |                 |    | 51 |    |    |     |     |     |     |     |     | $\leq 32 / \geq 128$     | 0           |
| Mupirocin        |                                                     |             |      |     |      |    |                 | 39 |    |    |    |     |     |     | 12  |     |     | $\leq 8 / > 256$         | 0           |
| Streptomycin     |                                                     |             |      |     |      |    |                 |    |    |    |    |     |     |     |     |     | 51  | $\leq 1000 / > 1000$     | 0           |
| Gentamycin       |                                                     |             |      |     |      | 45 | 4               |    |    |    |    |     |     | 1   |     | 1   |     | $\leq 1 / > 2$           | 11.76       |
| Linezolid        |                                                     |             | 3    | 3   | 16   | 20 | 8               | 1  |    |    |    |     |     |     |     |     |     | $\leq 4 / \geq 4$        | 1.96        |
| Tetracycline     |                                                     |             |      |     |      |    |                 | 32 | 19 |    |    |     |     |     |     |     |     | $\leq 4 / > 8$           | 0           |
| Erythromycin     |                                                     |             | 26   | 4   | 1    | 2  | 18              |    |    |    |    |     |     |     |     |     |     | $\leq 0.5 / > 4$         | 0           |
| Clindamycin      |                                                     |             |      |     | 40   | 3  | 8               |    |    |    |    |     |     |     |     |     |     | $\leq 0.5 / > 2$         | 15.68       |
| Vancomycin       |                                                     |             |      |     | 1    | 18 | 30              | 1  | 1  |    |    |     |     |     |     |     |     | $\leq 4 / > 8$           | 0           |
| Teicoplanin      |                                                     |             |      |     | 21   | 16 | 11              | 3  |    |    |    |     |     |     |     |     |     | $\leq 4 / > 8$           | 0           |
| Q/D <sup>a</sup> |                                                     |             | 37   | 8   | 3    |    | 3               |    |    |    |    |     |     |     |     |     |     | $\leq 2 / > 2$           | 5.88        |
| Chloranphenicol  |                                                     |             |      |     |      |    |                 | 40 | 11 |    |    |     |     |     |     |     |     | $\leq 8 / > 8$           | 21.57       |
| Rifampin         |                                                     |             |      |     | 49   | 2  |                 |    |    |    |    |     |     |     |     |     |     | -                        | -           |
| Imipenem         |                                                     | 34          | 6    | 2   | 5    | 3  | 1               |    |    |    |    |     |     |     |     |     |     | -                        | -           |
| T/S <sup>b</sup> | $\leq 1/38$                                         | $\geq 2/38$ |      |     |      |    |                 |    |    |    |    |     |     |     |     |     |     | -                        | -           |
|                  | 37                                                  | 14          |      |     |      |    |                 |    |    |    |    |     |     |     |     |     |     |                          |             |
| Augmentine       | $\leq 0.5/0.25$                                     | 1/0.5       | 2/1  | 4/2 | >8/4 |    |                 |    |    |    |    |     |     |     |     |     |     | $\leq 0.5/0.25 // > 2/1$ | 5.88        |
|                  | 33                                                  | 10          | 4    | 2   | 1    |    |                 |    |    |    |    |     |     |     |     |     |     |                          |             |

<sup>a</sup>Q/D: Quinupristin/Dalfopristin; <sup>b</sup>T/S: Trimethoprim/sulfamethoxazole; <sup>c</sup>17 isolates  $> 2 \mu\text{g/ml}$  of Oxacillin.
