# Supplementary material for: Staphylococcus epidermidis: A differential trait of the fecal microbiota of breast-fed infants
Source: PubMed Central journal article supplement (PMC2551609; doi:10.1186/1471-2180-8-143), 2008-09-10
Supplement: 1471-2180-8-143-S3.pdf [file 1471-2180-8-143-S3.pdf]

### Analysis of virulence determinants among the enterococcal strains

| Mother/infant pair  | Strain | Source <sup>a</sup> | <i>gelE</i> | <i>cylA</i> | <i>efaA<sub>6</sub></i> | <i>ccf</i> | <i>cad</i> | <i>cob</i> | <i>cpd</i> | <i>eps</i> | <i>agg</i> | <i>vanA</i> | <i>vanB</i> | <i>vanD</i> | <i>vanE</i> | <i>vanG</i> | Hemolysis |
|---------------------|--------|---------------------|-------------|-------------|-------------------------|------------|------------|------------|------------|------------|------------|-------------|-------------|-------------|-------------|-------------|-----------|
| <i>E. faecalis:</i> |        |                     |             |             |                         |            |            |            |            |            |            |             |             |             |             |             |           |
| 1                   | HC046  | BF                  | +           | -           | +                       | +          | +          | +          | +          | -          | -          | -           | -           | -           | -           | -           | -         |
| 2                   | HE10   | BF                  | +           | -           | +                       | +          | -          | -          | +          | +          | -          | -           | -           | -           | -           | -           | -         |
| 3                   | MF002  | M/BF                | +           | +           | +                       | +          | +          | +          | +          | -          | +          | -           | -           | -           | -           | -           | +         |
| 4                   | HG502  | BF                  | -           | -           | +                       | +          | +          | +          | +          | +          | +          | -           | -           | -           | -           | -           | -         |
| 5                   | HI04   | BF                  | +           | -           | +                       | +          | +          | +          | +          | +          | +          | -           | -           | -           | -           | -           | -         |
| 7                   | MO22   | BF                  | +           | -           | +                       | +          | -          | +          | +          | -          | -          | -           | -           | -           | -           | -           | -         |
| 8                   | HP523  | BF                  | +           | +           | +                       | +          | -          | -          | +          | +          | +          | -           | -           | -           | -           | -           | -         |
| 9                   | HM501  | BF                  | -           | -           | +                       | -          | +          | +          | +          | +          | -          | -           | -           | -           | -           | -           | -         |
| 10                  | MV02   | BF                  | +           | -           | +                       | +          | +          | +          | +          | +          | +          | -           | -           | -           | -           | -           | -         |
| 11                  | MX01   | BF                  | +           | -           | +                       | +          | +          | +          | +          | -          | -          | -           | -           | -           | -           | -           | -         |
| 11                  | HX152  | BF                  | +           | -           | +                       | +          | +          | +          | +          | -          | -          | -           | -           | -           | -           | -           | -         |
| 12                  | MZ02   | BF                  | -           | -           | +                       | -          | +          | +          | +          | -          | +          | -           | -           | -           | -           | -           | +         |
| 12                  | HZ241  | BF                  | +           | +           | +                       | +          | +          | +          | +          | -          | +          | -           | -           | -           | -           | -           | -         |
| 13                  | MCC02  | BF                  | +           | +           | +                       | +          | +          | +          | +          | +          | +          | -           | -           | -           | -           | -           | -         |
| 13                  | HCC523 | BF                  | +           | -           | +                       | +          | +          | +          | +          | -          | +          | -           | -           | -           | -           | -           | -         |
| 15                  | MDD01  | BF                  | +           | -           | +                       | +          | +          | +          | +          | -          | +          | -           | -           | -           | -           | -           | +         |
| 17                  | MA006  | FF                  | +           | -           | +                       | +          | +          | +          | +          | +          | +          | -           | -           | -           | -           | -           | -         |
| 18                  | MK01   | FF                  | +           | -           | +                       | +          | +          | +          | +          | +          | -          | -           | -           | -           | -           | -           | -         |
| 18                  | HK103  | FF                  | +           | -           | +                       | +          | -          | -          | +          | -          | -          | -           | -           | -           | -           | -           | -         |
| 19                  | MU23   | FF                  | +           | +           | +                       | +          | +          | +          | +          | -          | +          | -           | -           | -           | -           | -           | +         |
| 20                  | MW02   | FF                  | +           | -           | +                       | +          | +          | +          | +          | +          | +          | -           | -           | -           | -           | -           | +         |
| 20                  | HW121  | FF                  | -           | +           | +                       | +          | +          | +          | +          | +          | +          | -           | -           | -           | -           | -           | -         |
| 21                  | HBB141 | FF                  | +           | +           | +                       | +          | +          | +          | +          | +          | +          | -           | -           | -           | -           | -           | -         |
| 21                  | HBB501 | FF                  | +           | -           | +                       | +          | +          | +          | +          | +          | +          | -           | -           | -           | -           | -           | +         |
