# Supplementary material for: Staphylococcus epidermidis: A differential trait of the fecal microbiota of breast-fed infants
Source: PubMed Central journal article supplement (PMC2551609; doi:10.1186/1471-2180-8-143), 2008-09-10
Supplement: 1471-2180-8-143-S4.pdf [file 1471-2180-8-143-S4.pdf]

**MIC distribution and percentage of resistance to different antibiotics among the enterococcal strains**

| Antibiotic       | Number of isolates with a MIC ( $\mu\text{l/ml}$ ) of |                       |                 |                 |                  |    |    |    |    |     |     |      |             | S/R <sup>a</sup> | % Resistance       |       |
|------------------|-------------------------------------------------------|-----------------------|-----------------|-----------------|------------------|----|----|----|----|-----|-----|------|-------------|------------------|--------------------|-------|
|                  | $\leq 0.25$                                           | 0.5                   | 1               | 2               | 4                | 8  | 16 | 32 | 64 | 128 | 256 | >500 | $\leq 1000$ |                  |                    | >1000 |
| Penicillin       |                                                       |                       |                 | 18              | 10               | 1  |    |    |    |     |     |      |             |                  | $\leq 8/\geq 16$   | 0     |
| Ampicillin       |                                                       | 1                     | 23              | 4               | 1                |    |    |    |    |     |     |      |             |                  | $\leq 8/\geq 16$   | 0     |
| Oxacillin        |                                                       |                       |                 |                 | 29 <sup>d</sup>  |    |    |    |    |     |     |      |             |                  | -                  | -     |
| Ciprofloxacin    |                                                       | 1                     | 14              | 14              |                  |    |    |    |    |     |     |      |             |                  | $\leq 1/\geq 4$    | 0     |
| Fosfomycin       |                                                       |                       |                 |                 |                  |    | 1  | 20 | 8  |     |     |      |             |                  | $\leq 64/\geq 256$ | 0     |
| Nitrofurantoin   |                                                       |                       |                 |                 |                  |    |    | 24 | 5  |     |     |      |             |                  | $\leq 32/\geq 128$ | 0     |
| Mupirocin        |                                                       |                       |                 |                 | 4                |    |    |    |    |     | 25  |      |             |                  | -                  | -     |
| Streptomycin     |                                                       |                       |                 |                 |                  |    |    |    |    |     |     |      | 19          | 10               | $\leq 1000/>1000$  | 34.48 |
| Gentamycin       |                                                       |                       |                 |                 | 1                | 12 |    |    | 15 |     | 1   |      |             |                  | $\leq 500/>500$    | 3.44  |
| Linezolid        |                                                       |                       |                 | 22              | 6                | 1  |    |    |    |     |     |      |             |                  | $\leq 2/\geq 8$    | 3.44  |
| Tetracycline     |                                                       |                       |                 |                 | 13               | 16 |    |    |    |     |     |      |             |                  | $\leq 4/\geq 16$   | 0     |
| Erythromycin     | 3                                                     | 4                     | 5               | 6               | 11               |    |    |    |    |     |     |      |             |                  | $\leq 0.5/\geq 8$  | 0     |
| Clindamycin      |                                                       | 1                     | 1               | 27              |                  |    |    |    |    |     |     |      |             |                  |                    |       |
| Vancomycin       |                                                       | 2                     | 7               | 14              | 6                |    |    |    |    |     |     |      |             |                  | $\leq 4/\geq 32$   | 0     |
| Teicoplanin      |                                                       | 29                    |                 |                 |                  |    |    |    |    |     |     |      |             |                  | $\leq 8/\geq 32$   | 0     |
| Q/D <sup>b</sup> |                                                       | 2                     |                 | 4               | 23               |    |    |    |    |     |     |      |             |                  | $\leq 1/\geq 4$    | 79.31 |
| Chloramphenicol  |                                                       |                       |                 |                 |                  |    | 24 | 5  |    |     |     |      |             |                  | $\leq 8/\geq 32$   | 0     |
| Rifampin         |                                                       |                       | 14              | 15              |                  |    |    |    |    |     |     |      |             |                  | $\leq 1/\geq 4$    | 0     |
| Imipenem         |                                                       |                       | 4               | 19              | 5                | 1  |    |    |    |     |     |      |             |                  | -                  | -     |
| T/S <sup>c</sup> | $\frac{\leq 1/38}{27}$                                | $\frac{\geq 2/38}{2}$ |                 |                 |                  |    |    |    |    |     |     |      |             |                  | -                  | -     |
| Augmentine       | $\frac{\leq 0.5/0.25}{12}$                            | $\frac{1/0.5}{15}$    | $\frac{2/1}{2}$ | $\frac{4/2}{2}$ | $\frac{>8/4}{2}$ |    |    |    |    |     |     |      |             |                  | -                  | -     |

<sup>a</sup> S/R: Susceptible/Resistant [44], <sup>b</sup> Q/D: Quinupristin/Dalfopristin, <sup>c</sup> T/S: Trimethoprim/sulfamethoxazole; <sup>d</sup> 29 isolates >2  $\mu\text{g/ml}$  of Oxacillin
